# Supplementary material
Source: publisher site journal article supplement (https://www.dovepress.com/article/384377)
Supplement: Supplementary file 1 [file get_supplementary_file.php]

**Four events for the “unethical event” situation in the formal experiment:**

**Unethical event against customers**: While procuring non-critical components, and in response to the rising prices of raw materials and fierce market competition for similar products, firm A chooses raw materials that meet the quality requirements but whose quality is significantly lower than advertised for the product, thereby ensuring a normal profit level.

**Unethical event against peers**: Firm F has a technical team in its Research and Development Department that transitioned from a rival firm en masse two years ago. They are developing new products that are extremely similar to the rival firm, and competing for speed to market.

**Unethical event against employees**: Firm K implements a stringent management system. Employees are working under strenuous conditions and suffering from varying degrees of depression each year. There have also been employee suicides. However, the firm has not provided any assistance to the families of the employees involved.

**Unethical event against society**: Firm M received a government grant for environmental protection. They did not use all the funds to purchase environmental protection equipment or enable technological transformation. Although the firm’s emissions comply with national regulations, it does not meet the commitment promised at the time of application for environmental protection funding.

**Four events for the “normal event” situation in the formal experiment:**

**Normal event involving customers**: With rising raw material prices, there is fierce competition for similar products on the market. To prevent the loss of customers, firm A has compressed its own operating margins and has not raised product prices.

**Normal event involving peers**: When selling products, employees of firm F are committed to publicizing the quality and innovation of the firm’s products. They have never used sales practices that denigrate competitors’ products to sell their own products or solicit orders from customers.

**Normal event involving employees**: Firm K implements a humanized management system that does not put too much work pressure on employees. It has a psychological counseling room that provides free counseling services for employees who may have psychological problems.

**Normal event involving society**: Firm M has received a government grant for environmental protection, which has all been used to purchase environmental protection equipment and technical renovations. The firm’s environmental emissions have now conformed to the national regulations.
